# Supplementary material
Source: MDPI journal article supplement (https://www.mdpi.com/2073-445X/11/3/406)
Supplement: s1 [file s1]

Archive with 6 entries (6 files):
- FigureS1.pdf
- FigureS2.pdf
- FigureS3.pdf
- FigureS4.pdf
- FigureS5.pdf
- FigureS6.pdf
