# Supplementary material
Source: MDPI journal article supplement (https://www.mdpi.com/2073-445X/11/3/406)
Supplement: s1 [file s1 › FigureS1.pdf]

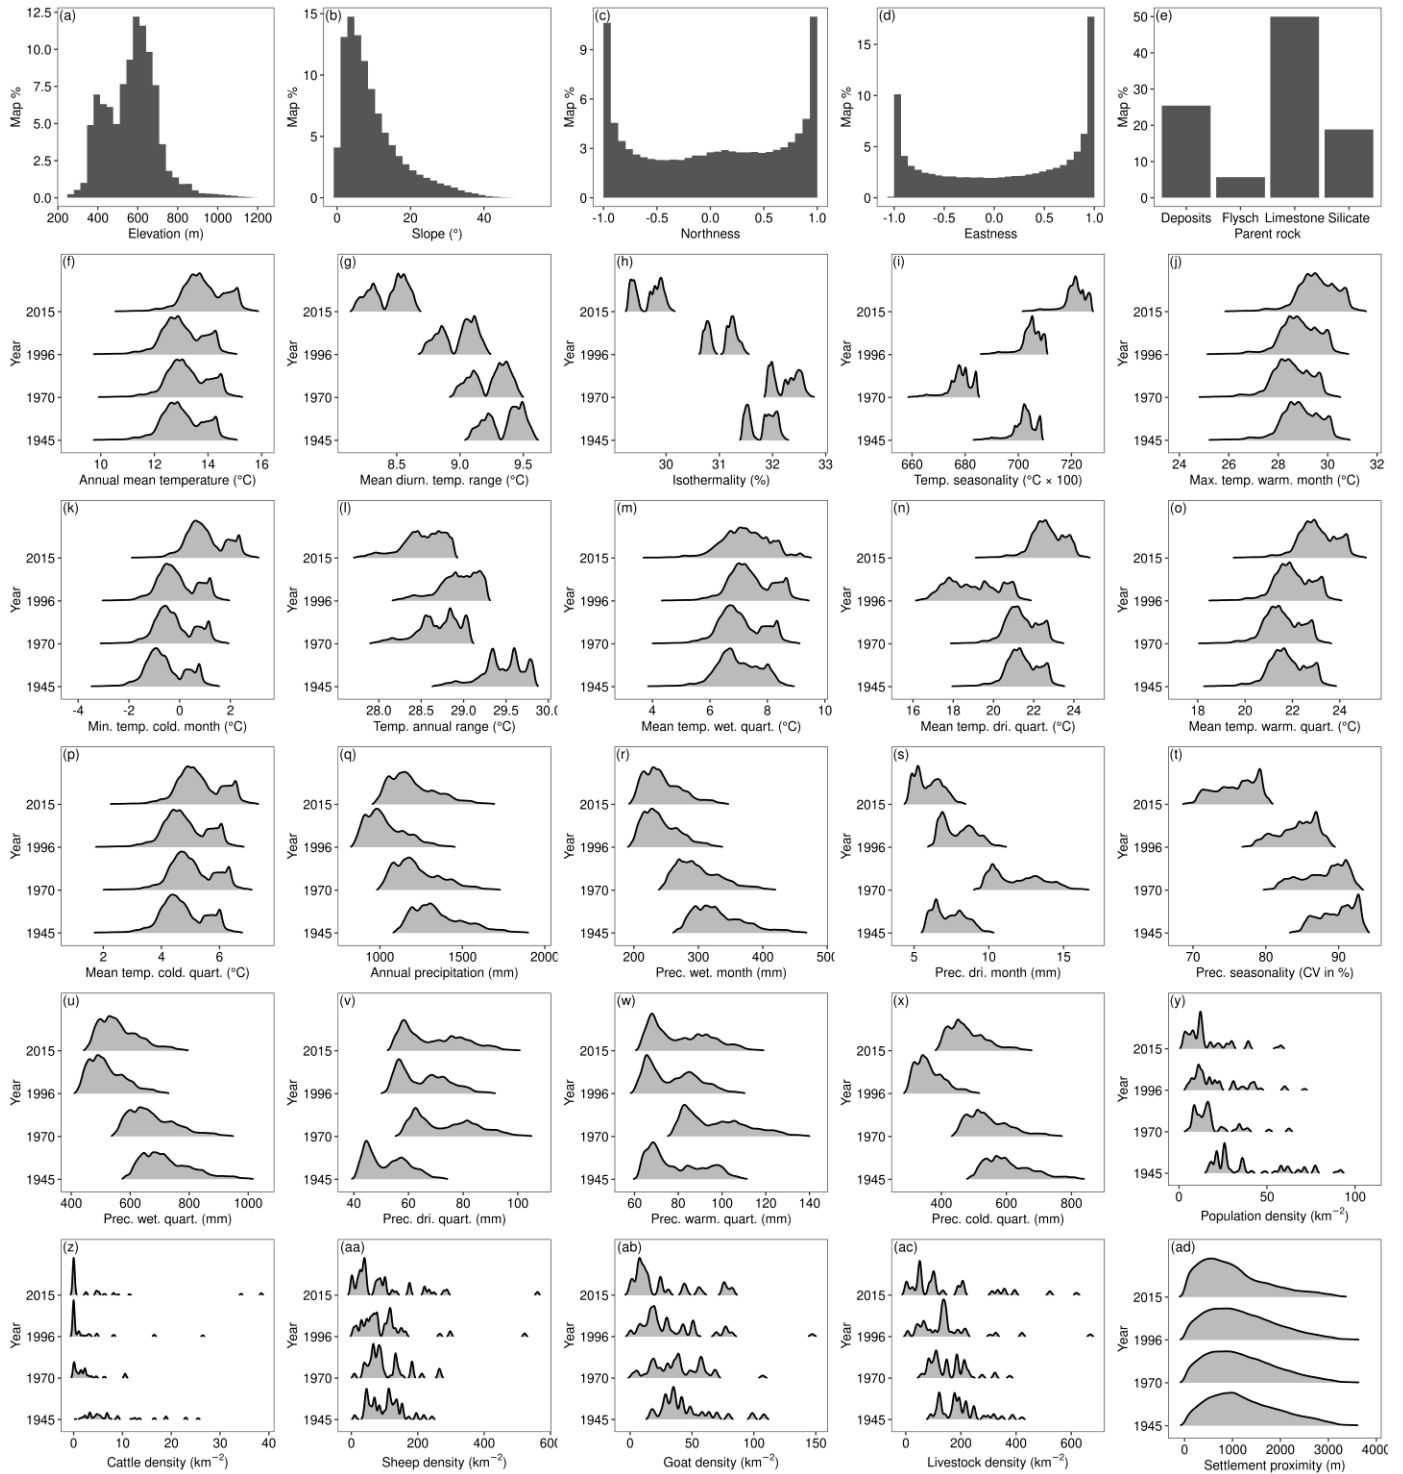

Figure S1: Distribution of biophysical and socioeconomic predictor variables in the pixels of our study area's maps. Some variables were fixed in time, whereas others varied.
