# Supplementary material
Source: MDPI journal article supplement (https://www.mdpi.com/2073-445X/11/3/406)
Supplement: s1 [file s1 › FigureS2.pdf]

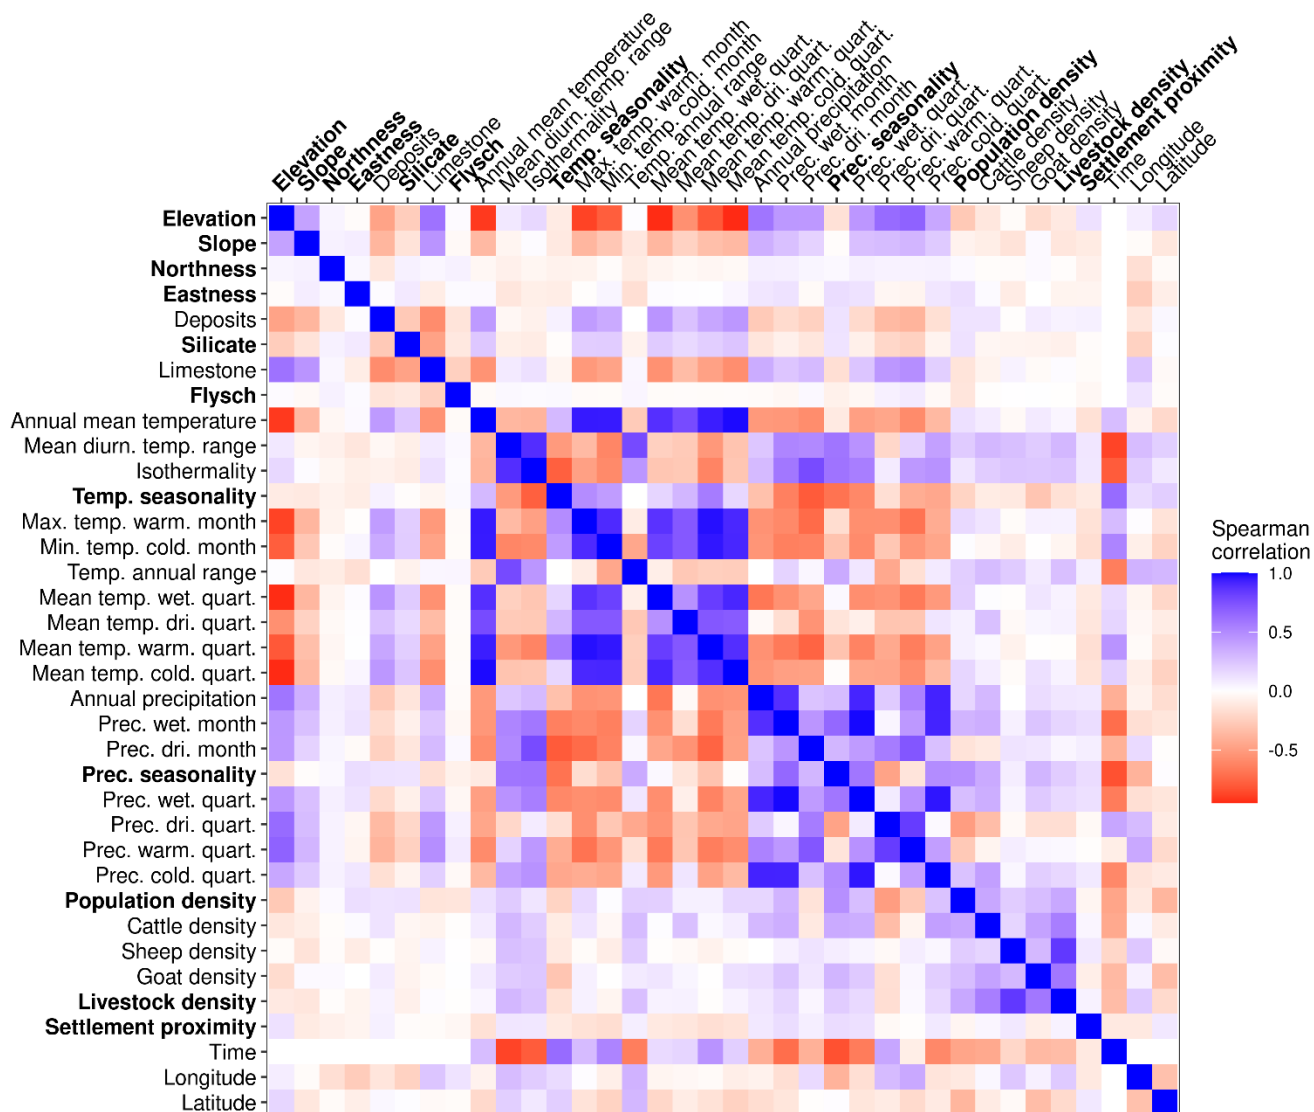

Figure S2: Spearman correlation coefficient values between candidate predictors for modelling land type occurrence and succession intensity. We have also appended a “time” variable (years since the earliest year 1945), plus longitude and latitude. The four categories of parent rock were more conveniently introduced to the random forest models as presence–absence, binary variables, i.e. one variable for the presence of each category of parent rock. Aiming for lower inter-correlations but also higher interpretability, we selected the variables in bold for random forest modelling (plus longitude and latitude).
