# Supplementary material
Source: MDPI journal article supplement (https://www.mdpi.com/2073-445X/11/3/406)
Supplement: s1 [file s1 › FigureS5.pdf]

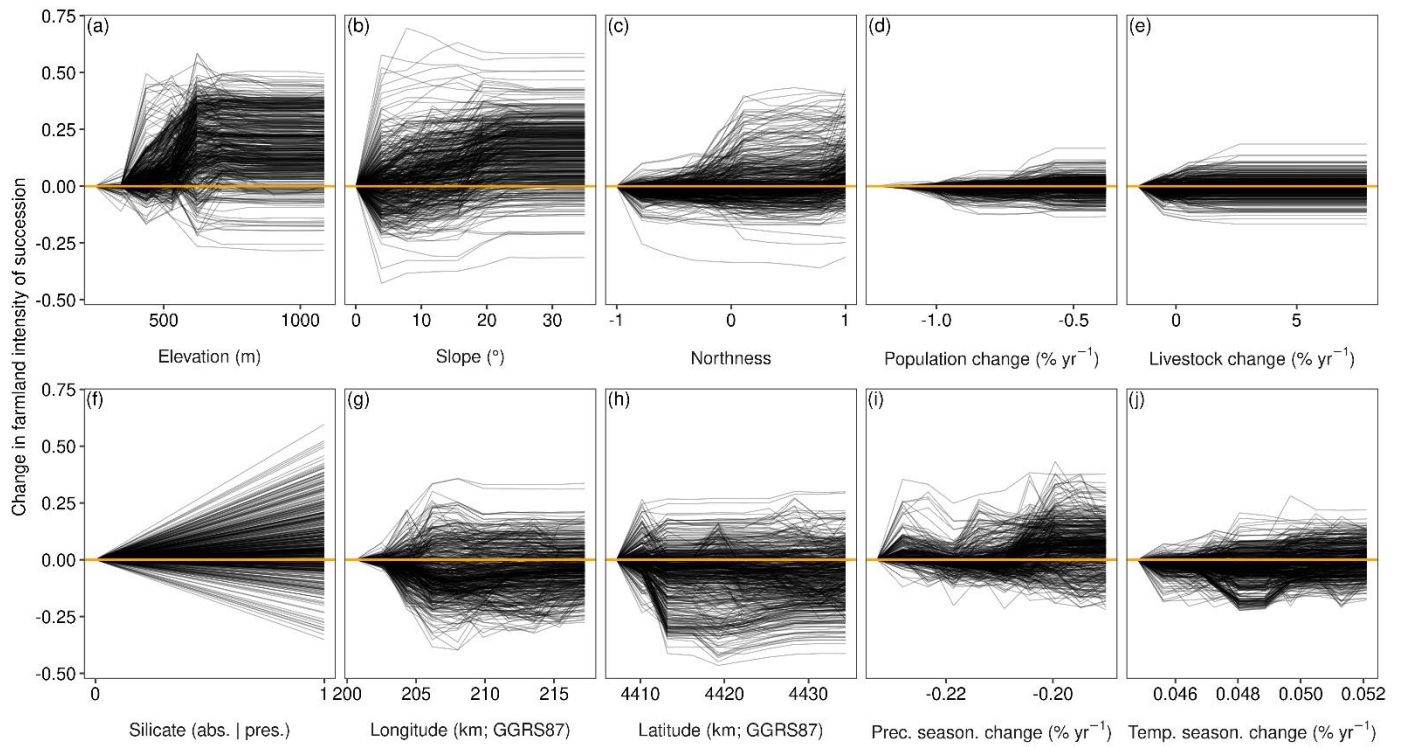

Figure S5: Individual conditional expectation curves of the top 10 variables most strongly related to farmland succession intensity. Only a random sample of 500 from the  $n$  curves is shown with the dark and thin curves. For comparability, the curves are centred to the mean prediction for the left-most, minimum value of each predictor.
